# Supplementary material
Source: ML conference proceedings conference paper supplement (https://openaccess.thecvf.com/content/ICCV2025/html/Wang_PLAN_Proactive_Low-Rank_ICCV_2025_paper.html)
Supplement: Supplementary file 1 [file Wang_PLAN_Proactive_Low-Rank_ICCV_2025_supplemental.pdf]

## A. Appendix

### A.1. Analysis on Hyperparameter $S$

The parameter  $S$  in Eq. (12) denotes the size of the sliding window used to accumulate frequencies for basis selection. To analyze its impact, we computed the top-10 selected basis indices in the final layer for a task on CIFAR-100, varying  $S$  from 1 to 100. As shown in Figure 4, the set of selected indices stabilizes very quickly. The indices chosen with a small window (e.g.,  $S = 50$ ) are nearly identical to those chosen with a full window ( $S = 100$ , equivalent to all training steps). This indicates that a short-term memory of perturbation sensitivity is sufficient for robust basis selection, justifying our choice of  $S = 50$  for efficiency.

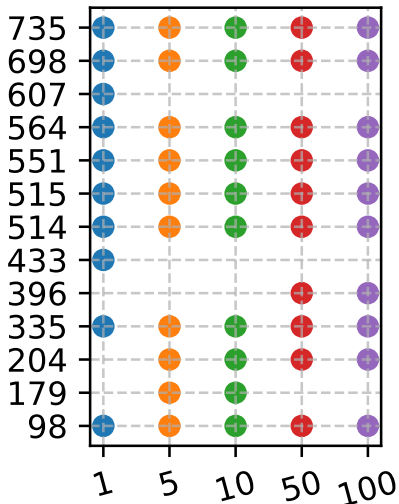

Figure 4. Top-10 selected basis indices (y-axis) for the next task as a function of the sliding window size  $S$  (x-axis). Each colored line tracks a specific basis index. The selection stabilizes with a small  $S$ .

### A.2. Analysis on Hyperparameter $\rho$

The hyperparameter  $\rho$  controls the perturbation magnitude in our min-max objective (Eq. (8)). We performed an ablation study on *ImageNet-R* ( $N = 5$ ) to determine its optimal value. The results are shown in Table 8. A value of  $\rho = 0.01$  provides the best balance, leading to the highest performance. Larger values (e.g., 0.1) or smaller values (e.g., 0.001) resulted in slightly degraded performance, demonstrating the model’s sensitivity to this parameter.

### A.3. Discussion on Backward Transfer

Our work prioritizes stability, using strict orthogonal subspaces to effectively mitigate catastrophic forgetting, a success confirmed by our strong empirical results. This focus on interference prevention, however, means that PLAN does

Table 8. Ablation study on  $\rho$  on *ImageNet-R* ( $N = 5$ ).

| $\rho$      | Acc (%)      | AAA (%)      |
|-------------|--------------|--------------|
| 0.1         | 75.23        | 78.94        |
| <b>0.01</b> | <b>77.79</b> | <b>81.93</b> |
| 0.001       | 76.38        | 79.36        |

not explicitly facilitate positive backward transfer. Given that significant backward transfer is rarely observed in rehearsal-free CL, this represents a deliberate design choice. For future work, we believe exploring methods to dynamically adjust the degree of orthogonality could unlock opportunities for knowledge sharing across tasks while maintaining robustness.
